# Supplementary material for: Lead isotope analysis of melt inclusions by LA-MC-ICP-MS
Source: Royal Society of Chemistry journal article supplement (doi:10.1039/c4ja00088a), 2014-01-01
Supplement: c4ja00088a1.pdf [file c4ja00088a1.pdf]

Supplementary data S1 the Pb isotope results for Neptune tuning solution

| $^{208}\text{Pb}$ intensity<br>(cps) | integratio<br>n time |             | $^{206}\text{Pb}/^{204}\text{Pb}$ | $^{207}\text{Pb}/^{204}\text{Pb}$ | $^{208}\text{Pb}/^{204}\text{Pb}$ | $^{207}\text{Pb}/^{206}\text{Pb}$ | $^{208}\text{Pb}/^{206}\text{Pb}$ |
|--------------------------------------|----------------------|-------------|-----------------------------------|-----------------------------------|-----------------------------------|-----------------------------------|-----------------------------------|
| Belshaw et al.,1998                  |                      |             | <b>16.932</b>                     | <b>15.487</b>                     | <b>36.683</b>                     | <b>0.91463</b>                    | <b>2.1665</b>                     |
| 190000                               | 1.049s               | mean (n=40) | 16.926                            | 15.481                            | 36.664                            | 0.9146                            | 2.1661                            |
|                                      |                      | SD          | 0.021                             | 0.020                             | 0.050                             | 0.0003                            | 0.0014                            |
|                                      |                      | 2RSD        | 0.24%                             | 0.26%                             | 0.27%                             | 0.07%                             | 0.13%                             |
|                                      |                      | Accuracy    | -0.02%                            | -0.01%                            | -0.02%                            | 0.01%                             | 0.00%                             |
|                                      | 0.131s               | mean (n=40) | 16.929                            | 15.484                            | 36.673                            | 0.9146                            | 2.1663                            |
|                                      |                      | SD          | 0.025                             | 0.022                             | 0.057                             | 0.0005                            | 0.0016                            |
|                                      |                      | 2RSD        | 0.30%                             | 0.28%                             | 0.31%                             | 0.11%                             | 0.15%                             |
|                                      |                      | Accuracy    | 0.00%                             | 0.00%                             | 0.01%                             | 0.01%                             | 0.01%                             |
| 32000                                | 1.049s               | mean (n=20) | 16.924                            | 15.478                            | 36.647                            | 0.9146                            | 2.1654                            |
|                                      |                      | SD          | 0.032                             | 0.032                             | 0.084                             | 0.0007                            | 0.0021                            |
|                                      |                      | 2RSD        | 0.37%                             | 0.41%                             | 0.46%                             | 0.15%                             | 0.19%                             |
|                                      |                      | Accuracy    | -0.03%                            | -0.03%                            | -0.07%                            | 0.00%                             | -0.03%                            |
|                                      | 0.131s               | mean (n=20) | 16.931                            | 15.485                            | 36.680                            | 0.9146                            | 2.1665                            |
|                                      |                      | SD          | 0.051                             | 0.045                             | 0.118                             | 0.0007                            | 0.0013                            |
|                                      |                      | 2RSD        | 0.60%                             | 0.58%                             | 0.64%                             | 0.15%                             | 0.12%                             |
|                                      |                      | Accuracy    | 0.01%                             | 0.01%                             | 0.03%                             | 0.01%                             | 0.02%                             |
