# Supplementary material for: Lead isotope analysis of melt inclusions by LA-MC-ICP-MS
Source: Royal Society of Chemistry journal article supplement (doi:10.1039/c4ja00088a), 2014-01-01
Supplement: c4ja00088a2.pdf [file c4ja00088a2.pdf]

## Supplementary data S2 Calculation for initial lead isotope ratios

The decay equations for  $^{232}\text{Th}$ - $^{208}\text{Pb}$ ,  $^{235}\text{U}$ - $^{207}\text{Pb}$  and  $^{238}\text{U}$ - $^{206}\text{Pb}$  are as follows:

$$\left(\frac{^{208}\text{Pb}}{^{204}\text{Pb}}\right)_i = \left(\frac{^{208}\text{Pb}}{^{204}\text{Pb}}\right)_m - \left(\frac{^{232}\text{Th}}{^{204}\text{Pb}}\right)_m (e^{\lambda_1 t} - 1) \quad 1$$

$$\left(\frac{^{207}\text{Pb}}{^{204}\text{Pb}}\right)_i = \left(\frac{^{207}\text{Pb}}{^{204}\text{Pb}}\right)_m - \left(\frac{^{235}\text{U}}{^{204}\text{Pb}}\right)_m (e^{\lambda_2 t} - 1) \quad 2$$

$$\left(\frac{^{206}\text{Pb}}{^{204}\text{Pb}}\right)_i = \left(\frac{^{206}\text{Pb}}{^{204}\text{Pb}}\right)_m - \left(\frac{^{238}\text{U}}{^{204}\text{Pb}}\right)_m (e^{\lambda_3 t} - 1) \quad 3$$

Where the subscript  $i$  indicates initial values and  $m$  indicates measured values.

By dividing Eq. 1 and Eq. 2 by Eq. 3, we have:

$$\left(\frac{^{208}\text{Pb}}{^{206}\text{Pb}}\right)_i = \frac{^{208}\text{Pb}_m - ^{232}\text{Th}_m (e^{\lambda_1 t} - 1)}{^{206}\text{Pb}_m - ^{238}\text{U}_m (e^{\lambda_3 t} - 1)} \quad 4$$

$$\left(\frac{^{207}\text{Pb}}{^{206}\text{Pb}}\right)_i = \frac{^{207}\text{Pb}_m - ^{235}\text{U}_m (e^{\lambda_2 t} - 1)}{^{206}\text{Pb}_m - ^{238}\text{U}_m (e^{\lambda_3 t} - 1)} \quad 5$$

By dividing the denominators and numerators on the right-hand side of Eq. 4 and 5 with  $^{206}\text{Pb}$  signal intensity, we obtain:

$$\left(\frac{^{208}\text{Pb}}{^{206}\text{Pb}}\right)_i = \frac{\left(\frac{^{208}\text{Pb}}{^{206}\text{Pb}}\right)_m - \left(\frac{^{232}\text{Th}}{^{206}\text{Pb}}\right)_m (e^{\lambda_1 t} - 1)}{1 - \left(\frac{^{238}\text{U}}{^{206}\text{Pb}}\right)_m (e^{\lambda_3 t} - 1)} \quad 6$$

$$\left(\frac{^{207}\text{Pb}}{^{206}\text{Pb}}\right)_i = \frac{\left(\frac{^{207}\text{Pb}}{^{206}\text{Pb}}\right)_m - \left(\frac{^{235}\text{U}}{^{206}\text{Pb}}\right)_m (e^{\lambda_2 t} - 1)}{1 - \left(\frac{^{238}\text{U}}{^{206}\text{Pb}}\right)_m (e^{\lambda_3 t} - 1)} \quad 7$$

By replacing  $^{235}\text{U}$  with  $^{238}\text{U}/137.88$ , we have:

$$\left(\frac{^{207}\text{Pb}}{^{206}\text{Pb}}\right)_i = \frac{\left(\frac{^{207}\text{Pb}}{^{206}\text{Pb}}\right)_m - \frac{1}{137.88} \left(\frac{^{238}\text{U}}{^{206}\text{Pb}}\right)_m (e^{\lambda_2 t} - 1)}{1 - \left(\frac{^{238}\text{U}}{^{206}\text{Pb}}\right)_m (e^{\lambda_3 t} - 1)} \quad 8$$

All the values with a subscript of  $m$  in Eq. 6 and 8 are measured by LA-MC-ICPMS

and  $t$ , which is the sample age, was determined in previous studies. Then with these measured values, the initial  $^{208}\text{Pb}/^{206}\text{Pb}$  and  $^{207}\text{Pb}/^{206}\text{Pb}$  were obtained.
