# Supplementary material for: Lead isotope analysis of melt inclusions by LA-MC-ICP-MS
Source: Royal Society of Chemistry journal article supplement (doi:10.1039/c4ja00088a), 2014-01-01
Supplement: c4ja00088a3.pdf [file c4ja00088a3.pdf]

**Supplementary data S3** Lead isotope ratios and the ranges of  $^{208}\text{Pb}$ ,  $^{204}\text{Pb}$ ,  $^{232}\text{Th}$  and  $^{238}\text{U}$  intensities of melt inclusions from the Emeishan flood basalts

|                                           |         | Ratios                            |                                   | Signal intensities (cps) |                   |                   |                  |
|-------------------------------------------|---------|-----------------------------------|-----------------------------------|--------------------------|-------------------|-------------------|------------------|
|                                           |         | $^{208}\text{Pb}/^{206}\text{Pb}$ | $^{207}\text{Pb}/^{206}\text{Pb}$ | $^{208}\text{Pb}$        | $^{204}\text{Pb}$ | $^{232}\text{Th}$ | $^{238}\text{U}$ |
| Pb isotope ratios without age corrections | Maximum | 2.1014                            | 0.8426                            | 373000                   | 10700             | 93400             | 63100            |
|                                           | Minimum | 2.0275                            | 0.8070                            | 32600                    | 1720              | 8360              | 5460             |
|                                           | Average | 2.0671                            | 0.8215                            | 150000                   | 4915              | 40300             | 25300            |
|                                           | 2RSD    | 1.3%                              | 1.7%                              |                          |                   |                   |                  |
| Pb isotope ratios after age corrections   | Maximum | 2.1179                            | 0.8617                            |                          |                   |                   |                  |
|                                           | Minimum | 2.0610                            | 0.8330                            |                          |                   |                   |                  |
|                                           | Average | 2.0911                            | 0.8445                            |                          |                   |                   |                  |
|                                           | 2RSD    | 1.0%                              | 1.2%                              |                          |                   |                   |                  |
